15. Shulman K: Small artery and vein pressures in the subarachnoid space of the dog. *J Surg Res* 5:56-61, 1965
16. Welch K, Friedman V: The cerebrospinal fluid valves. *Brain* 83:454-469, 1960
17. Langfitt TW: Increased intracranial pressure. *Clin Neurosurg* 16:436-471, 1969
18. Rosomoff HL: Effect of hypothermia and hypotonic urea on distribution of intracranial contents. *J Neurosurg* 18:753-759, 1961
19. Langfitt TW, Weinstein JD, Kassell NF, et al.: Transmission of increased intracranial pressure. II. Within the supratentorial space. *J Neurosurg* 21:998-1005, 1964
20. Cotev S, Cullen D, Severinghaus J: Cerebral ECF acidosis induced by hypoxia at normal and low pCO<sub>2</sub>. *Scand J Clin Lab Invest* 22, suppl 102:3:E, 1968
21. Kaasik AE, Nilsson L, Siesjö BK: Acid-base and lactate-pyruvate changes in brain and CSF in asphyxia and stagnant hypoxia. *Scand J Clin Lab Invest* 22, suppl 102:3:C, 1968
22. Pappius HM: The distribution of water in brain tissues swollen *in vitro* and *in vivo*. *Biology of Neuralgia*. Edited by EDP De Robertis, R Carrea. *Progr Brain Res* 15: 135-154, 1965
23. Adolph RJ, Fukusumi H, Fowler NO: Origin of cerebrospinal fluid pulsations. *Amer J Physiol* 212:840-846, 1967
24. Bering EA Jr: Choroid plexus and arterial pulsation of cerebrospinal fluid; demonstration of choroid plexuses as cerebrospinal fluid pump. *Arch Neurol Psychiat* 73:165-172, 1955
25. Harding V: Properties of pulse waves in visco-elastic tubings, *Handbook of Physiology*. Volume I, section 2, Circulation. Washington, D. C., American Physiological Society, 1962, pp 107-135
26. Heck AF: Observations on continuous vascular pulsative phenomena in the cerebral cortex of experimental animals with special reference to the effects of closed vs. opened calvarium, *Cerebral Circulation*. Edited by W Luyendijk. *Progr Brain Res* 30:145-149, 1968

## Respiration

**LUNG ULTRASTRUCTURE** Morphology which correlates structure and function of the lung requires fixation techniques which preserve the lung in a condition close to its physiologic state. With standard methods, the fixatives are instilled into the airways. The results are adequate for most studies, provided that conditions are standardized with reference to the toxicity of the instillate (it should be isotonic), and the pressure under which it is injected is controlled. This technique, however, does alter the morphology of the extracellular materials, including the alveolar lining layers, surfactant, and the mucous lining of the bronchial tree. To preserve these factors, the author recommends that the fixative be perfused through the lesser circulation, while airway pressure is kept constant, with the transpulmonary and perfusion pressures under close control. A set of five solutions was administered directly into the

pulmonary artery: 1) Ringer's solution containing papaverine sulfate and heparin; 2) 1.5 per cent glutaraldehyde with 1.5 per cent dextran in collidine buffer; 3) Ringer's solution alone; 4) osmium tetroxide with 1.5 per cent dextran in collidine buffer; 5) uranyl acetate in maleate buffer. The dextran adjusts the colloidal osmotic pressure to levels similar to blood. With this technique the author was able to visualize clearly the extracellular lining layers and also to identify tubular myelin figures as a major component of the alveolar lining layer. Intravascular perfusion fixation will also preserve other extracellular liquids in the lung, such as the lining layer of airways and intra-alveolar edema. The author suggests that this technique would be of special value in studies of air pollution. (Gil, J.: *Ultrastructure of Lung Fixed under Physiologically Defined Conditions*, *Arch. Intern. Med.* 127: 896-902, 1971.)
